# Supplementary material
Source: PubMed Central journal article supplement (PMC2901870)
Supplement: NIHMS205854-supplement-supplement_1.pdf [file NIHMS205854-supplement-supplement_1.pdf]

**Supplementary Table 1. Age-Adjusted Rates [per 10,000; 95% Confidence Interval (CI)] of Incident Coronary Heart Disease in White and Black Women According to Optimism and Cynical Hostility Groups**

| <b>Optimism</b>          |             | <b>Group</b>    |                |              |
|--------------------------|-------------|-----------------|----------------|--------------|
| <b>Total # events</b>    | <b>Most</b> | <b>Mid-High</b> | <b>Mid-Low</b> | <b>Least</b> |
| <b>White*</b>            |             |                 |                |              |
| (n = 3865)               | 43 (38, 48) | 48 (43, 54)     | 49 (44, 55)    | 60 (54, 66)  |
| <b>Black†</b>            |             |                 |                |              |
| (n = 315)                | 47 (32, 70) | 48 (31, 73)     | 54 (37, 78)    | 58 (42, 82)  |
| <b>Cynical Hostility</b> |             | <b>Group</b>    |                |              |
|                          | <b>Most</b> | <b>Mid-High</b> | <b>Mid-Low</b> | <b>Least</b> |
| <b>White*</b>            |             |                 |                |              |
| (n = 3865)               | 57 (51, 63) | 52 (46, 58)     | 49 (44, 54)    | 44 (40, 49)  |
| <b>Black ‡</b>           |             |                 |                |              |
| (n = 315)                | 53 (39, 72) | 47 (31, 70)     | 56 (38, 84)    | 51 (31, 86)  |
| * p < .0001              |             |                 |                |              |
| † p < .007               |             |                 |                |              |
| ‡ p = 0.14               |             |                 |                |              |

**Supplementary Table 2. Age-Adjusted Rates [per 10,000; 95% Confidence Interval (CI)] of Total Mortality in White and Black Women According to Optimism and Cynical Hostility Groups\***

| <b>Optimism</b>          |              | <b>Group</b>    |                |              |  |
|--------------------------|--------------|-----------------|----------------|--------------|--|
|                          | <b>Most</b>  | <b>Mid-High</b> | <b>Mid-Low</b> | <b>Least</b> |  |
| <b>White</b>             |              |                 |                |              |  |
| <b>(n = 4098)</b>        | 46 (41, 51)  | 51 (46, 57)     | 51 (45, 56)    | 61 (55, 67)  |  |
| <b>Black</b>             |              |                 |                |              |  |
| <b>(n = 399)</b>         | 47 (32, 70)  | 54 (37, 81)     | 81 (49, 110)   | 85 (64, 112) |  |
| <b>Cynical Hostility</b> |              | <b>Group</b>    |                |              |  |
|                          | <b>Most</b>  | <b>Mid-High</b> | <b>Mid-Low</b> | <b>Least</b> |  |
| <b>White</b>             |              |                 |                |              |  |
| <b>(n = 4098)</b>        | 60 (54, 66)  | 52 (47, 58)     | 51 (46, 56)    | 47 (43, 52)  |  |
| <b>Black</b>             |              |                 |                |              |  |
| <b>(n = 399)</b>         | 87 (69, 110) | 63 (44, 89)     | 51 (34, 77)    | 39 (23, 69)  |  |
| * all p values < .0001   |              |                 |                |              |  |
